# Supplementary material for: The genomic determinants of adaptive evolution in a fungal pathogen
Source: PubMed Central journal article supplement (PMC6546377; doi:10.1002/evl3.117), 2019-05-01

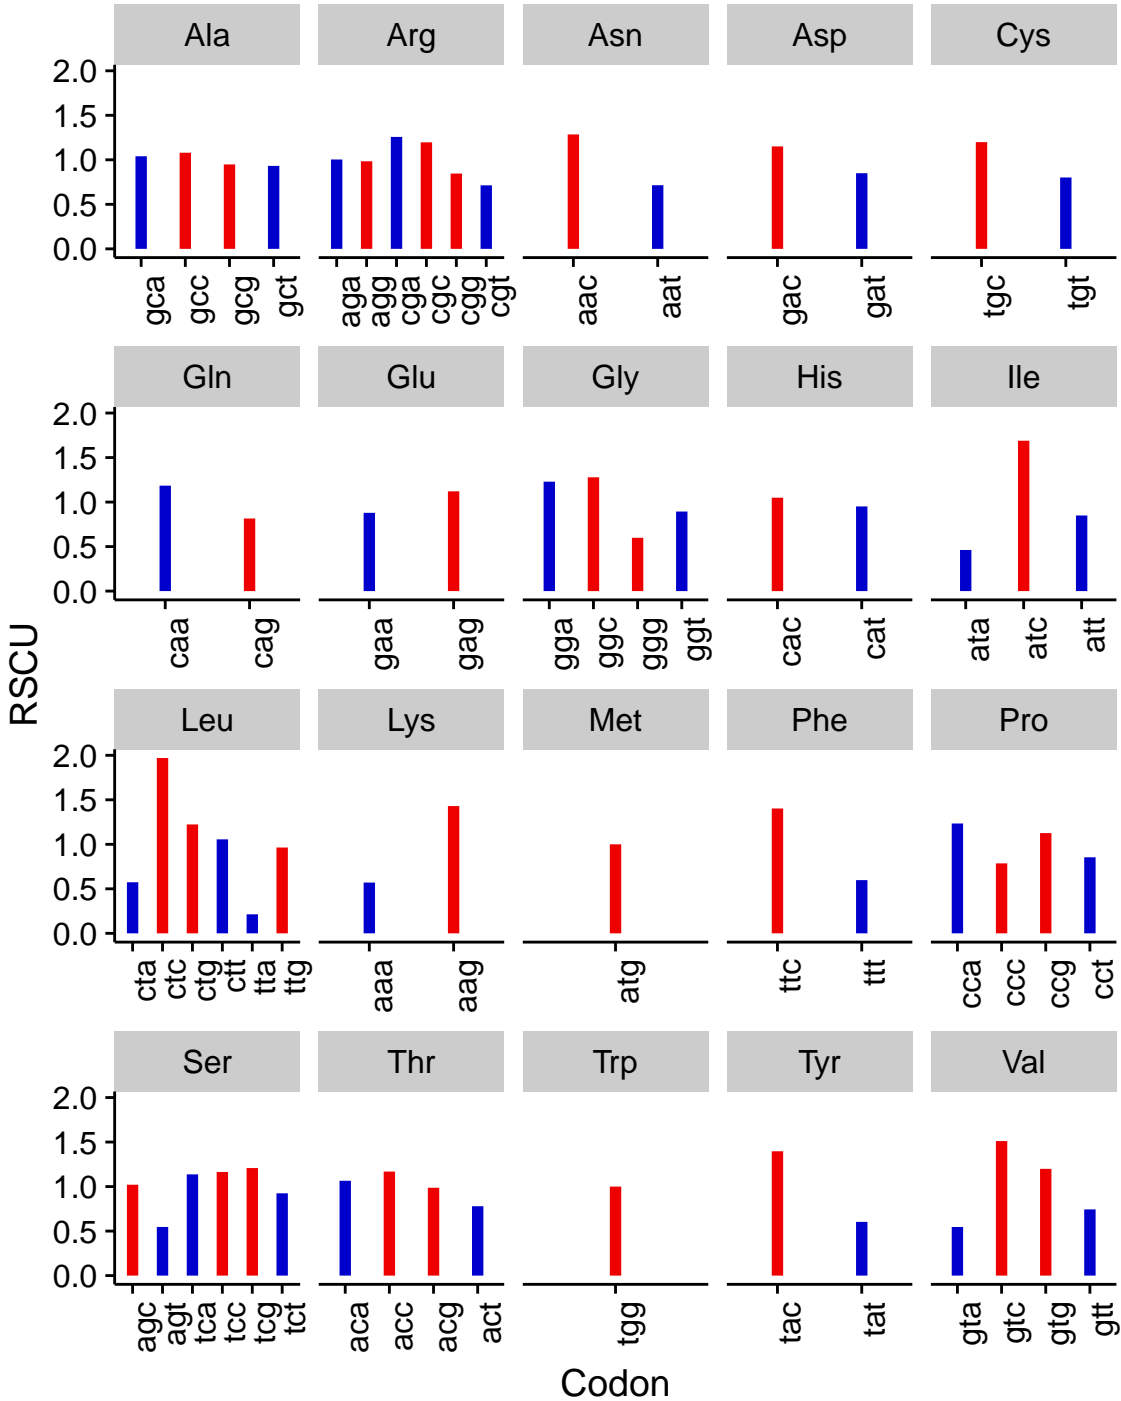

Supplement: EVL3-3-299-s001.pdf [file EVL3-3-299-s001.pdf]
